# CuNA: Cumulant-based Network Analysis of genotype-phenotype associations in Parkinson's Disease

Aritra Bose<sup>1,†</sup>, Daniel E. Platt<sup>1,†</sup>, Niina Haiminen<sup>1</sup>, and Laxmi Parida<sup>1,\*</sup>

<sup>1</sup>Computational Genomics, IBM T.J Watson Research Center, Yorktown Heights, NY 10598

<sup>†</sup>Equal contribution

\*Corresponding author: [parida@us.ibm.com](mailto:parida@us.ibm.com)

## Abstract

Parkinson's Disease (PD) is a progressive neurodegenerative movement disorder characterized by loss of striatal dopaminergic neurons. Progression of PD is usually captured by a host of clinical features represented in different rating scales. PD diagnosis is associated with a broad spectrum of non-motor symptoms such as depression, sleep disorder as well as motor symptoms such as movement impairment, etc. The variability within the clinical phenotype of PD makes detection of the genes associated with early onset PD a difficult task. To address this issue, we developed CuNA, a cumulant-based network analysis algorithm that creates a network from higher-order relationships between eQTLs and phenotypes as captured by cumulants. We also designed a multi-omics simulator, CuNASim to test CuNA's qualitative accuracy. CuNA accurately detects communities of clinical phenotypes and finds genes associated with them. When applied on PD data, we find previously unreported genes INPP5J, SAMD1 and OR4K13 associated with symptoms of PD affecting the kidney, muscles and olfaction. CuNA provides a framework to integrate and analyze RNA-seq, genotype and clinical phenotype data from complex diseases for more targeted diagnostic and therapeutic solutions in personalized medicine. CuNA and CuNASim binaries are available upon request.

# 1 Introduction

A primary goal in complex disease genetics is to understand how genes influence the symptoms, that is, the mapping from genotype to phenotype. The knowledge about etiology and pathogenesis of a disease provides a basis for targeted treatment and prevention. Case-control genome wide association studies (GWAS) and whole-exome sequencing (WES) are useful methods to understand the rare causative mutations that underlie complex diseases with small effects from common variants [1]. Quantitative Trait Loci (eQTL) studies bridge these methods by enabling investigation of the effect of the genotypes or risk loci on gene expression levels and how, in turn, they affect phenotypes [2]. expression eQTL analysis is used to determine hotspots, construct causal networks, discover stratification in clinical phenotypes and select genes for clinical trials [3]. The application of these methods have revealed a significant number of risk loci [4–6] in complex diseases.

Parkinson’s Disease (PD) is such a complex neurological disorder affecting approximately 1.2% of the world’s septuagenarian population. PD has a rapid progression characterized by motor symptoms due to loss of dopaminergic neurons in the substantia nigra and presence of Lewy bodies [7], bradykinesia, rigidity and tremor [8]. PD progresses from early symptoms such as mild non-motor manifestations to significant degenerative effects on mobility and muscle control [9] in advanced stages. The progression of symptoms of PD is tracked by rating scales which asses different stages of the disease. The most widely accepted rating scale is the Hoehn and Yahr (HY) scale [10], while another comprehensive assessment scale is the Unified Parkinson’s Disease Rating Scale sponsored by the Movement Disorder Society (MDS-UPDRS) [11]. Recently, over 41 genetic susceptibility loci have been associated with late-onset PD in the largest GWAS meta-analysis up to date [12]. Few genes have been found to be causal among these risk loci, but for majority of loci, it is not yet known which genes are linked with PD risk. Moreover, despite concerted efforts in understanding the genomic processes underlying the progression of the disease, the clinical heterogeneity of PD makes it elusive. There is a complex interaction between motor and non-motor symptoms, with both impacting key issues such as sleep, constipation, depression and muscle movement [13, 14]. It has also been hypothesized that PD actually comprises two subtypes, brain-first or body-first [15]. Due to this heterogeneity in clinical features and their trajectories, it is important to understand the biological processes underlying these groups of features and symptoms.

To this end, we developed CuNA, namely, Cumulant-based Network Analysis. CuNA finds higher order genotype-phenotype interactions by integrating genes implicated in the disease as obtained from GWAS or eQTL studies and the associated phenotypes or clinical features.

35 Hence, we find groups of features from the similar subsets of subjects using logical relation-  
36 ships among features called “redescription” clusters and subsequent cumulant computations.  
37 CuNA performs community detection on the network constructed from the significant higher-  
38 order interactions between clinical features and genes related to the disease. To show that  
39 CuNA accurately captures the interaction between the biomarkers and phenotypes, we de-  
40 signed CuNASim, a simulator for gene expression, genotypes and phenotypes. CuNASim is a  
41 multi-omics simulator which simulates genomics and transcriptomics data accounting for en-  
42 dophenotypes. It also captures eQTLs and relationships between omics data with an array of  
43 clinical phenotypes. Although in framework it is similar to a prior multi-omics simulator [16],  
44 CuNASim provides simulation scenarios with relative correlation of each phenotype with a  
45 user defined set of biomarkers (genes and genotypes).

46 To disentangle the effects of heterogeneity of PD, we applied CuNA to the collection of  
47 data from the Parkinson’s Progression Markers Initiative (PPMI) study (<https://www.ppmi->  
48 [info.org](https://www.ppmi-info.org)). We found several novel genes associated with a collection of PD phenotypes. Al-  
49 though previous work has demonstrated success in predicting PD status from gene expression  
50 data (e.g. [17]), associations of genes with the phenotypic measurements underlying PD di-  
51 agnosis have not been reported before at this level of granularity. CuNA enables us to find  
52 such interactions which are often not captured by traditional GWAS, highlighting the clinical  
53 heterogeneity of the disease. Although, we apply CuNA to understand the biological under-  
54 pinnings of motor and non-motor symptoms of PD, the method can be applied to a host of  
55 complex diseases which are captured by an array of clinical features, symptoms, environmen-  
56 tal and behavioral effects such as Alzheimer’s Disease, Coronary Artery Disease ad metabolic  
57 syndrome, Cancer and other neurological disorders. CuNA finds biomarkers associated with  
58 these clinical and non-genetic features paving the path for future biomarker discovery and  
59 therapeutics for complex diseases.

## 60 2 Methods

### 61 2.1 CuNASim

62 CuNASim is a multi-omics simulator integrating phenotypes, genotypes, and gene expres-  
63 sion levels. To handle the integration of different omics data we started with a multivariate  
64 distribution

$$f(x)d^d x = \sqrt{\frac{\det(A)}{(2\pi)^d}} \exp\left(-\frac{1}{2}(x - \mu)^T A(x - \mu)\right) d^d x \quad (1)$$

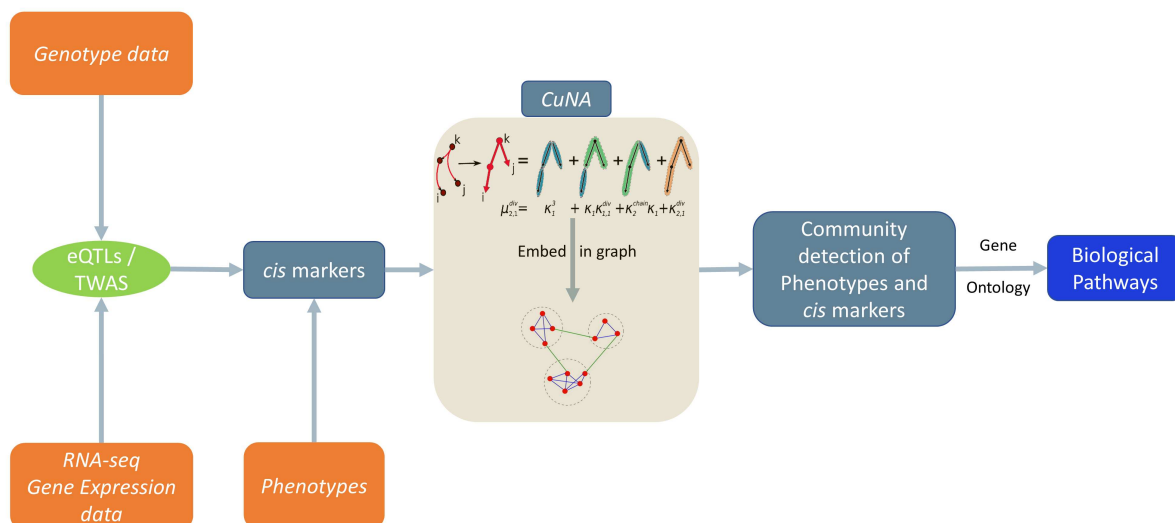

Figure 1: Overview of the study design with CuNA playing a central role. Inputs are colored in orange and output in blue.

65 Components of  $x$  were identified as phenotypic (binary, which may include environmental  
66 conditions as well), SNP (pairs of binary alleles, one for each of the chromosome pairs), or  
67 gene expression (floating). Covariances  $A^{-1}$  were specified in terms of  $A = \sigma \text{cor}(x, x^T) \sigma$  where  
68 the  $\sigma$  is a diagonal matrix with values representing the spread of the variates, and  $\text{cor}(x, x^T)$   
69 is specified to yield correlations among phenotypes, alleles between each pair of chromosomes  
70 representing Hardy-Weinberg disequilibrium, and among gene expression levels reflecting co-  
71 regulation among pathways. Correlations between phenotypes, SNPs and expression levels  
72 reflect interactions including allele impacts on expression levels, relationships between SNPs,  
73 expression levels, and disease/phenotype processes, driven by biological pathways. Offsets  $\mu$   
74 set quantities such as MAF, case/control proportions, and expression level centers. Binary  
75 values were mapped from  $I(x_i \geq 0)$ . The fraction of cases are  $E(I(x_i \geq 0))$ . Genotypes were  
76 mapped from  $I(x_I \geq 0) + I(x_{i+1} \geq 0)$ . MAF is then  $E(I(x_i \geq 0))$ . ORs may be derived  
77 from the joint probabilities  $E(I(x_i \geq 0 \wedge x_j \geq 0))$  for SNP values  $x_i$ . Expression levels were  
78 mapped to  $\exp(x_i)$ .

79 We simulated three different simulation scenarios for 1,000 samples and 11 features (3  
80 phenotypes, 3 SNPs and 5 genes with varying expression levels). Although CuNAsim can  
81 generate high dimensional data we restricted our toy simulation to demonstrate the accuracy of  
82 CuNA in picking out the genotype-phenotype interactions with the highest Pearson correlation

83 coefficient ( $r^2$ ) and to demonstrate its robustness in presence of false positives and correcting  
84 for spurious associations. To achieve this objective we designed three scenarios with varying  
85 correlations. In the first scenario, we designed an extreme case where only a few features among  
86 the genes, SNPs and phenotypes were highly correlated with each other (inset in Figure 2).  
87 In the second case, we took an average case where many of the features were moderately  
88 correlated with each other (Supplementary Figure 5). For the third case we performed a  
89 sanity check with completely uncorrelated features, therefore, the resulting correlation matrix  
90 being equal to an identity matrix.

## 91 **2.2 Parkinson’s Disease Data**

### 92 **RNA-seq expression data**

93 We compiled RNA-seq gene expression data from the PPMI phase 2 release containing 4,649  
94 blood-based samples across five visits and 34,386 genes with Transcripts per million (TPM)  
95 values. PPMI annotates samples with labels reflecting whether they are from de novo PD  
96 subjects (subjects diagnosed with PD for two years or less and are not taking PD medications;  
97 annotated as PD) and from control subjects without PD who are 30 years or older and do not  
98 have a blood relative with PD diagnosis (annotated as HC). We used PD (n=293) and HC  
99 (n=163) samples only from the baseline visit for our analyses as the number of overlapping  
100 samples with genotype and gene expression data for other visits were low.

### 101 **Genotype data**

102 The genotype data released in Phase 1 of PPMI contained 960 individuals and approximately  
103 44 million high quality Single Nucleotide Polymorphisms (SNPs) that passed GATK VQSR  
104 quality control. We further filtered SNPs with missing genotyping rate  $> 0.02$  for SNPs  
105 and individuals, respectively and Minor Allele Frequency (MAF)  $> 0.05$ , Hardy-Weinberg  
106 equilibrium  $> 1e - 6$  and removed individuals with heterozygosity rates with more than three  
107 standard deviations from the mean resulting in 5.6 million SNPs. We only selected PD and  
108 HC samples having baseline gene expression data, 456 individuals.

## 109 **2.3 CuNA**

110 CuNA integrates the phenotypes related to PD (or any disease) along with the genetic vari-  
111 ants or genes as features, and computes higher-order associations between these features to  
112 find subsets of features influencing groups of individuals with similar underlying biological

113 pathways. An outline of the algorithm is given in Algorithm 1. CuNA computes cumulants  
114 and construct networks with only statistically significant connections between any two pair of  
115 features  $i$  and  $j$ . It computes  $N_{i,j}$  as a tuple of number of cumulant groups containing both  $i$   
116 and  $j$  denoted as  $n_{i,j}$ , number of cumulant groups containing only  $i$ :  $n_{i,*}$ , number of cumulant  
117 groups containing only  $j$ :  $n_{*,j}$  and number of cumulant groups without either of  $i$  or  $j$ . This  
118 allows us to compute a Fisher's exact test and obtain significance parameters for each pair  $i$   
119 and  $j$  and whether the edge between them in a network would be at random. We form the  
network with pairs of features which has a  $p < 0.05$  in the Fisher's exact test.

---

**Algorithm 1** CuNA: Cumulant-based Network Analysis

---

**Input:** Set of  $k$  features  $\mathbf{Y} = y_1, y_2, \dots, y_k$  containing candidate genes and phenotypes of PD.

**Output:** Communities,  $\mathbf{M} = m_1, m_2, \dots, m_p$  of interactions between the genes and phenotypes.

- 1: Compute  $G$ 's (Equation 3) to identify higher-order interactions between  $\mathbf{Y}$ .
  - 2: Perform permutation tests and obtain  $\mathbf{F}$ , statistically significant subsets of features.
  - 3: Construct network and detect communities:  $\mathbf{M} = \text{NetCoDe}(\mathbf{F})$
  - 4: Annotate  $\mathbf{M}$  to discover biological pathways underlying candidate genes and phenotypes.
- 

---

**Algorithm 2** NetCoDe: Network formation and community detection

---

**Input:**  $\mathbf{F} = f_1, f_2, \dots, f_l$  where  $f_i$  is a group of  $k$  features denoted by  $f_i = f_{i_1}, f_{i_2}, \dots, f_{i_k}$ .

**Output:** Communities,  $\mathbf{M} = m_1, m_2, \dots, m_p$  of interactions between the genes and phenotypes.

- 1: **FOR** all  $l$  groups of features:
  - 2:   **FOR** all  $(i, j)$  pair of  $\binom{k}{2}$  features:
  - 3:     Compute  $N_{i,j} = n_{i,j}, n_{*,j}, n_{i,*}, n_{*,*}$
  - 4:     Obtain p-value  $p_{i,j}$  Fisher's exact test on  $N_{i,j}$
  - 5:     **IF**  $p_{i,j} < 0.05$
  - 6:        $\mathbf{E} \cup e_{i,j}$
  - 7:        $\mathbf{V} \cup v_i, v_j$
  - 8:     **END IF**
  - 9:   **END FOR**
  - 10: **END FOR**
  - 11: Build a network,  $\mathbf{G} = (\mathbf{V}, \mathbf{E})$  where vertices ( $\mathbf{V}$ ) are features  $f_i$  and  $f_j$  and the edge ( $\mathbf{E}$ )  
between them have weights  $c_{i,j}$ .
  - 12: Perform community detection using Girvan-Newman method [18] and obtain  $\mathbf{M}$  communities.
- 

120

## 121 2.4 Study design

122 CuNA is a framework to study the genetic factors influencing the clinical features of a complex  
123 disease, in this case, PD with its motor and non-motor symptoms. As a first step, we take  
124 the genotype data as well as the RNA-seq gene expression data as input and compute eQTLs.  
125 We extract significant *cis-eGenes* (above a predefined statistical significance threshold) and  
126 include them as features with the phenotypic measurements related to PD. Thereafter, we ap-

127 ply CuNA (Cumulant-based Network Analysis) as a meta-analysis method on these candidate  
128 genes and phenotypic features in order to draw higher-order associations between them. We  
129 construct a network as part of CuNA and perform community detection on the network to  
130 obtain communities or clusters of interacting features (genes and phenotypes). Further gene  
131 ontology analysis is performed on these interacting genes to obtain the biological pathways  
132 highlighted for similar symptoms or features in PD. The outline of our approach is detailed  
133 in Figure 1.

### 134 **Computing eQTLs**

135 We used Matrix eQTL [19] for fast eQTL analysis on 34,386 genes and 5.6 million SNPs across  
136 456 individuals. For all of our eQTL analysis we used  $p$ -value threshold of  $1 \times 10^{-7}$  and FDR  
137  $< 0.05$  and a distance of  $1 \times 10^6$  base pairs in which the gene-SNP pair would be considered  
138 local and tagged as *cis*-eQTL (Supplementary Figure 1). Matrix eQTL tests for association  
139 between each SNP and transcript by modeling the effect of genotype as either additive linear  
140 or categorical. We computed the top 20 Principal Components (PCs) of the genotype data  
141 using TeraPCA [20] and included them along with age and gender information as covariates  
142 to correct for latent population structure (Supplementary Figure 2).

### 143 **Supervised classification**

144 We used machine learning approaches from Python's scikit-learn 0.23.2 package to classify HC  
145 from PD on 456 individuals (293 PD and 163 HC), with 25% of the data used for validation. We  
146 applied the Synthetic Minority Oversampling Technique (SMOTE) [21] to balance the PD and  
147 HC classes as we have more cases than controls. We used a host of classifiers such as Random  
148 Forest, Linear Regression, Ridge Regression, Support Vector Machine (SVM) with linear  
149 and Radial Basis Function (RBF) kernels, etc. on the training data set and performed five-  
150 fold cross validation (CV) for finding optimal hyper-parameters. We performed permutation  
151 tests using scikit-learn's model selection for classification to obtain statistical significance ( $p$ -  
152 value) of the performance of the chosen classifier using CV. Once these subsets of features  
153 are identified, we obtain statistical significance of each such group by permutation tests and  
154 from the significant subsets of features ( $p < 1e - 6$ , FDR  $< 0.05$  and  $|Z| > 3$ ), we construct a  
155 network.

156 CuNA builds the networks between the features and the edge weights between any two  
157 feature representing the number of times these features have grouped together in all the  
158 subsets of features in the cumulant computation. The interaction network thus can be very

159 dense with a total of  $\binom{k}{2}$  edges with  $k$  features. We thus allow only a small percentage of  
 160 edges until we have observed all  $k$  features due to ease of visualization and analysis. On this  
 161 network, we perform community detection using the algorithm described in Algorithm 2 and  
 162 analyze each such community drawing latent interactions between genes and the symptoms  
 163 or clinical features of the disease.

## 164 2.5 Cumulants

165 We seek to identify distinct groups of individuals whose pattern memberships may give hints  
 166 to underlying pathways involved with disease processes. Relationships between the roles of  
 167 these features defining the patterns are revealed in how multiple patterns capture the same  
 168 groups of subjects, called redescrptions (Details in Appendix A). Since most of the progression  
 169 markers collected in the PPMI are strongly correlated, and we need to factor out those strong  
 170 lower-order correlations from higher order associations marking distinct groups of individuals  
 171 differentiating disease processes as their Parkinson’s advances.

172 One approach towards such a factorization is suggested through a convergence of a number  
 173 of fields of study. Correlation expansions emerge naturally in quantum field theory, expressed  
 174 as a series of Feynman diagrams. These factored moments, essentially higher-dimensional  
 175 cumulants, may be factored to represent a set of “one-particle-irreducible” (1PI) diagrams [22].  
 176 Such emerge naturally in statistics of large deviations through Cramér’s theorem [23], which  
 177 also connects to the notion of “effective actions” from quantum field theory. Their generating  
 178 functions satisfy useful set partition relationships, and have been a part of traditional statistics  
 179 for some time [24].

180 This factorization is represented by a moment generating function

$$\begin{aligned}
 \mathbb{E} \left[ \exp \left( \sum_j F_j J_j \right) \right] &= A + \sum_l J_l G_l + \frac{1}{2!} \sum_w J_l J_{l'} G_{w'} + \\
 &\frac{1}{3!} \sum_{w''} J_l J_{l'} J_{l''} G_{w''} + \frac{1}{4!} \sum_{w'''} J_l J_{l'} J_{l''} J_{l'''} G_{w'''} + \dots \\
 &= \exp \left( \sum_l J_l K_l + \frac{1}{2!} \sum_w J_l J_{l'} K_w + \frac{1}{3!} \sum_{w''} J_l J_{l'} J_{l''} K_{w''} + \right. \\
 &\quad \left. \frac{1}{4!} \sum_{w'''} J_l J_{l'} J_{l''} J_{l'''} K_{w'''} + \dots \right)
 \end{aligned} \tag{2}$$

181 where the  $F_j$  are features indexed by  $j$  (defined in Algorithm 1), the  $G$ ’s represent moments,  
 182  $A$  is a constant offset (unity in this case) defined by  $J = 0$ , and the  $K$ ’s represent higher order  
 183 cumulants, e.g.  $G_{ij} = E(x_i x_j)$  and  $G_{ij\kappa} = E(x_i x_j x_\kappa^2)$ , and the  $K_{ij}$  and  $K_{ij\kappa}$  would be the



184 corresponding cummulants. These may be extracted in terms of the power series to yield

$$\begin{aligned}
 G_{\kappa} &= K_{\kappa} \\
 G_{\kappa\kappa'} &= K_{\kappa\kappa'} + K_{\kappa}K_{\kappa'} \\
 G_{\kappa\kappa'\kappa''} &= K_{\kappa\kappa'\kappa''} + K_{\kappa}K_{\kappa'\kappa''} + \\
 &\quad K_{\kappa'}K_{\kappa''\kappa} + K_{\kappa''}K_{\kappa\kappa'} + K_{\kappa}K_{\kappa'}K_{\kappa''} \\
 G_{\kappa\kappa'\kappa''\kappa'''} &= K_{\kappa\kappa'\kappa''\kappa'''} + K_{\kappa}K_{\kappa'\kappa''\kappa'''} + K_{\kappa'}K_{\kappa''\kappa'''\kappa} + \\
 &\quad K_{\kappa''}K_{\kappa'''\kappa\kappa'} + K_{\kappa'''}K_{\kappa\kappa'\kappa''} + K_{\kappa'''\kappa'}K_{\kappa''\kappa} + \\
 &\quad K_{\kappa'\kappa''}K_{\kappa'''\kappa} + K_{\kappa'''\kappa''}K_{\kappa\kappa'} + 2K_{\kappa}K_{\kappa'}K_{\kappa''\kappa'''} + \\
 &\quad 2K_{\kappa}K_{\kappa''}\kappa'''\kappa'' + 2K_{\kappa}K_{\kappa''}K_{\kappa'\kappa'''} + 2K_{\kappa'}K_{\kappa''}\kappa'''\kappa'' + \\
 &\quad 2K_{\kappa'}K_{\kappa''}\kappa'''\kappa'' + 2K_{\kappa''}\kappa'''\kappa\kappa' + K_{\kappa}K_{\kappa'}K_{\kappa''}\kappa'''.
 \end{aligned} \tag{3}$$

185 We apply this factorization to patterns, and test significance constructing null hypotheses and  
 186 variances by shuffling phenotypes.

## 187 2.6 Redescription clusters

188 Subjects  $s \in \mathcal{S}$  are described by a list of features  $f_i(s)$  indexed by feature labels  $i \in \mathcal{F}$ . Each  
 189 feature has an alphabet  $\mathcal{A}_i$  so that  $f_i(s) \in \mathcal{A}_i$  which is often binary, but could be defined on  
 190 the reals. Examples of binary features in  $\mathcal{F}$  are diagnoses (Dx) such as PD or other motor  
 191 and non-motor, symptoms, blood pressure, etc. which would have a continuum alphabet  
 192 ( $\mathcal{A}_{bmi} = \mathbb{R}$ ).

193 For a given  $a_i \in \mathcal{A}_i$ , the set of subjects that have that value is  $f_i^{-1}(a_i) \subseteq \mathcal{S}$ . So the list of  
 194 subjects with PD can be written  $f_{PD}^{-1}(1)$ . In the case of continuous variables, the selection of  
 195 sets is according to a threshold, such as the mean  $m(f_i(S))$ , mapped to 1 if  $f_i(s) \geq m(f_i(S))$ .

196 Patterns may be described in terms of conjunctions  $i \wedge j$  for  $i, j \in \mathcal{F}$  such that  $f_{i \wedge j}^{-1}(a_i, a_j) =$   
 197  $f_i^{-1}(a_i) \cap f_j^{-1}(a_j)$  for binary  $a_i, a_j$ . This definition is extended to include either atomic  $i, j$ ,  
 198 such as PD or T2D, or to any combinations of conjunctions subject to the logical algebra of  
 199  $\wedge$  (e.g.  $(i \wedge j) \wedge (i \wedge k) = i \wedge j \wedge k$  for  $i, j, k \in \mathcal{F}$  subject to values  $a_i, a_j, a_k$ ). So we can  
 200 specify the PD subjects with a motor or non-motor symptom such as walking or handwriting  
 201 as  $f_{Walk \wedge PD}^{-1}(Walk = 1, PD = 1)$ . Such combinations of conjunctions  $i$  that have more or  
 202 less members  $f_i^{-1}(a)$  than expected by chance are called patterns.

203 Binomial and other tests of the significance of patterns can be dominated by lower-order

204 correlations among the variables in a pattern. Two distinct patterns that yield the same  
205 subsets of subjects, e.g.  $f_i^{-1}(a) = f_j^{-1}(a)$ , are called “redescriptions.” If conjunctions yield a  
206 form such as  $A \cap B = B$ , then it may be deduced that  $B \subset A$ , and the conditions yielding  
207  $A$  and  $B$  satisfy  $b \Rightarrow a$ . In other words, redescriptions can reveal logical relationships among  
208 features. Such relationships may reflect underlying biological pathways reflected in these  
209 connected phenotype patterns. Therefore, each of these patterns  $i$  specify a phenotype, which  
210 may be associated with genotypes or other -omic data using standard methods.

211 Given the presence of misclassifications, differential evolution of disease stages, simple  
212 transcription mistakes, etc, result in errors in estimates of  $f_i^{-1}(a)$  must be accounted for in  
213 estimating equivalence. We can use Jaccard distances  $d = 1 - \frac{|A \cap B|}{|A \cup B|}$  measures deviations. So  
214  $d(A \cup B, B) = 1 - \frac{|A \cap B|}{|B|}$  is 0 if  $B \subseteq A$ , some non-zero value with any  $B \not\subseteq A$ . This distance  
215 measures the probability that samples drawn from  $A$  and  $B$  are not shared, which gives an  
216 index for the possible to distinguish disruption due to errors, or whether it would be possible  
217 to distinguish non biological pathways vs. biological pathways with error.

## 218 2.7 Pathway Analysis

219 We performed gene ontology by doing pathway enrichment analysis of the 24 cis-genes using  
220 the package `clusterProfiler` 3.8 [25] in R with the KEGG database [26], with  $p < 0.05$  and  
221 Benjamini-Hochberg false discovery rate adjustment.

## 222 3 Results

### 223 3.1 Simulation study

224 We applied CuNA on the data simulated by the multi-omics simulator CuNASim which was  
225 developed particularly for integrating genomics, transcriptomics and phenotypes. In the first  
226 scenario we allowed only a few highly correlated interactions between the features such as  
227 ( $Gene0 - SNP0$ ) with  $r^2 = 0.9$  , ( $Gene0 - SNP2$ ) with  $r^2 = 0.8$  , ( $Pheno0 - Pheno1$ )  
228 with  $r^2 = 0.6$ , etc. Using the simulated data from the first scenario as an input to the CuNA  
229 pipeline, we found the resulting embedded network from higher order interactions captures all  
230 the aforementioned interactions (Figure 2). Running the community detection algorithm on  
231 the network (Figure 2) we found the following communities:

- 232 -  $Gene0, SNP2, Pheno2$
- 233 -  $SNP0$

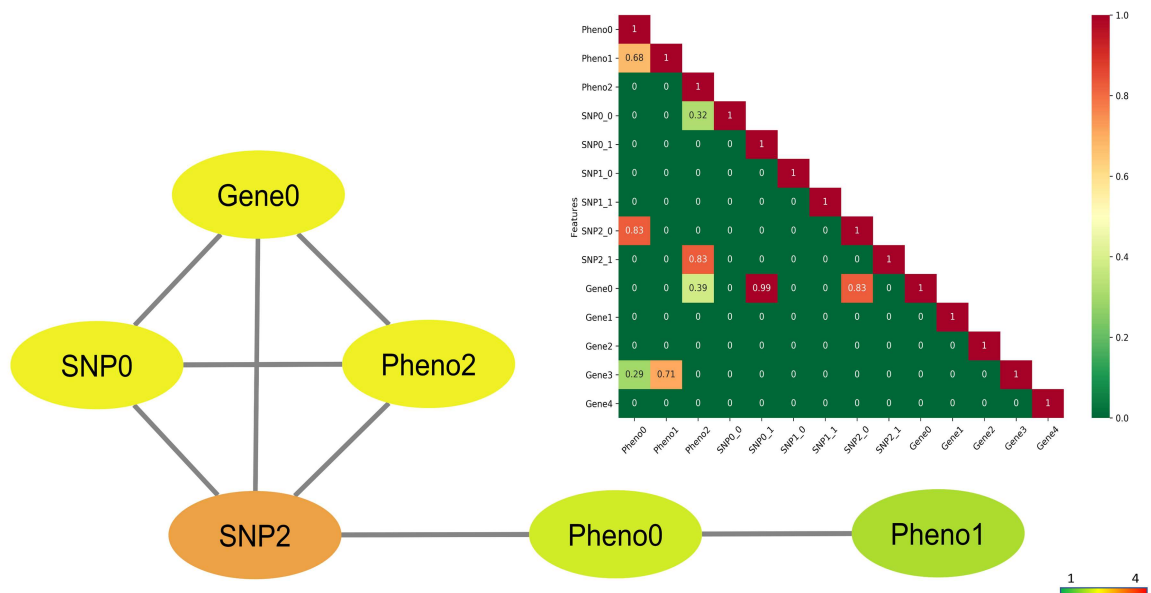

Figure 2: Network of the simulated variables from the first scenario with highly correlated features. The nodes are colored by degrees (darker colors have higher degree). The correlation matrix of the variables is shown in the inset with the color gradient.

234           – *Pheno0, Pheno1*

235 Thus, CuNA captures the communities accurately as reflected in the network (Figure 2) as  
 236 well as the original correlations which was the input to Algorithm 1.

237 For the average case with moderately correlated interactions between features as shown  
 238 in Supplementary Figure 5, we see a similar behavior when we applied CuNA. It captures  
 239 the highly correlated interactions such as (*Gene0 — SNP1*), (*Gene0 — Gene1*), (*Gene2 —*  
 240 *Pheno1*), etc. The communities also reflected clusters of biomarkers and phenotypes which  
 241 followed the input correlation matrix as shown in the inset of Supplementary Figure 5. They  
 242 were:

243           – *Gene0, Gene1, Gene2, SNP1, Pheno2*

244           – *SNP0, Pheno0*

245           – *Pheno1*

246 For another extreme case of no correlation between the features we found none of the in-  
 247 teractions crossed our user defined threshold of  $p < 1e - 6$ ,  $|Z| > 3$  and  $FDR < 0.05$ . As  
 248 expected, CuNA failed to observe anything significant from uncorrelated features even when  
 249 we increased the parameters for checking false positive associations. The parameters for gen-  
 250 erating the simulated correlations with mean  $\mu$  and standard deviation  $\sigma$  for each feature is

251 detailed in Supplementary Tables B-D for the first simulation scenario and in Supplementary  
252 Tables E-G for the second scenario.

### 253 3.2 Selecting predictive *cis-eGenes*

254 We computed eQTLs on the 456 PD and HC individuals having genotype and gene expression  
255 data from the baseline visit. We obtained 24 *cis* and 53,550 *trans* significant SNP-gene pairs.  
256 Given that *trans*-eQTL analyses are more prone to be affected by systematic errors between  
257 genomic regions than *cis*-eQTLs [27], we only considered *cis-eGenes*. Several of the associated  
258 *cis-eGenes* play a functional role in PD and are found to be significant in GTEx v8 analyses,  
259 expressed in brain tissues [28]. The *cis-eGenes* include known PD-associated genes such as the  
260 ubiquitin ligase NEDD4 which is protective against  $\alpha$ -synuclein accumulation and toxicity  
261 in animal models of PD [29], AGO2 which co-participates with PD gene LRRK2 [30], KIF1A  
262 which is a key regulator of neural circuit deterioration in aging leading to intellectual disability,  
263 muscle weakness, etc. [31], and LRTM1 whose cells survive and differentiate into midbrain  
264 dopaminergic neurons *in vivo* resulting in significant improvement in motor behavior [32].  
265 In addition, several of the genes are known to be expressed in the brain but not previously  
266 implicated in PD. Details about the protein-coding *cis-eGenes* and their expression in brain  
267 and other tissues can be found in Supplementary Table A.

268 We evaluated the performance of the 24 *cis-eGenes* in disease classification with machine  
269 learning methods on the blood-based gene expression data. The best performing method  
270 on the 75% training set was SVM with RBF kernel (Supplementary Figure 4). SVM (RBF  
271 kernel) resulted in an  $F_1$  score of 0.61 with precision and recall of 0.62 and 0.65, respectively  
272 on the 25% test set. This result was statistically significant (permutation test  $p$ -value 0.009).  
273 When we applied the SVM classification using all the genes in the RNA-seq data, we observed  
274 a similar  $F_1$  score of 0.62 as well as similar precision (0.63) and recall (0.66) on the test set  
275 (Table 1). Hence, the 24 *cis-eGenes* preserve the performance of the entire set of 34,386 genes  
276 when classifying PD cases vs. healthy subjects.

| Status                  | Precision | Recall | $F_1$ score |
|-------------------------|-----------|--------|-------------|
| <i>cis-eGenes</i> HC    | 0.53      | 0.24   | 0.33        |
| <i>cis-eGenes</i> PD    | 0.67      | 0.88   | 0.76        |
| <i>cis-eGenes</i> Total | 0.62      | 0.65   | 0.61        |
| All genes Total         | 0.63      | 0.66   | 0.62        |

Table 1: Classification performance of the 24 *cis-eGenes*, compared to using all genes.

277 KEGG pathway enrichment analysis of the 24 *cis-eGenes* revealed one statistically signifi-

278 cant pathway, inositol phosphate metabolism (Supplementary Figure 6). Phosphatidylinositol  
279 4,5 biphosphate enhances the presence of  $\alpha$ -synuclein's membrane association [33]. Inositol-  
280 phosphate signaling pathway may act to reduce autophagy and in turn play a vital role in  
281 neurodegenerative diseases [34] such as PD (due to a decline in autophagy).

### 282 3.3 CuNA reveals genotype-phenotype relationships

283 We combined for CuNA the gene expression data on the *cis-eGenes* and the motor and non-  
284 motor phenotypes obtained from the PPMI study which included the MDS-UPDRS features,  
285 HY scale, age, sex, etc. We computed the cumulants to find higher-order interactions be-  
286 tween all the features (including *cis-eGenes*). The cumulants' ability to separate higher-order  
287 moment contributions from possibly strong lower-order terms is highly desirable, and shows  
288 separability when applied to PPMI data contrasted with binomial tests of pattern significance.

289 Starting from 15,275 sets of features with similar patterns we filtered for significance by  
290 applying a threshold for  $p < 1e - 6$  and  $FDR < 0.05$  and obtained 761 significant sets of  
291 features. We constructed the network of dense interactions among all the associated features  
292 from these sets. The gene SAMD1 and the MDS-UPDRS variable *NP2SWAL* (chewing and  
293 swallowing issues) play central roles in the network with the top 20% of the edges (Supplemen-  
294 tary Figure 3). Allowing more edges make the network denser and does not add new nodes  
295 (features). Hence, for visualization purposes we use the top 20% of the edges.

296 To disentangle the interactions between genes and PD phenotypes we performed commu-  
297 nity detection on the network (Supplementary Figure 3) and obtained the following community  
298 clusters:

- 299 – A cluster with variables *Dx* (diagnosis) and *NHY* (Hoehn-Yahr scale).
- 300 – A second cluster with the variable *NP2SWAL* playing a central role with other non-motor  
301 symptoms such as *NP2SALV* (saliva and drooling) and *NP2SPCH* (speech). Other fea-  
302 tures such as *NP1FATG* (fatigue), *NP1LTHD* (light headedness) and *NP1SLPD* (day-  
303 time sleepiness) also interact in this cluster.
- 304 – A third cluster with the gene SAMD1 interacting with MDS-UPDRS variables such as  
305 *NP1PAIN* (pain), *NP1WALK* (walking and balance), *NP1CNST* (constipation) and  
306 *NP1URIN* (urinary problems). Genes such as INPP5J and OR4K13 along with the  
307 phenotype *Olfact* are also present.

308 For visualizing the communities in detail, we computed the Maximum Spanning Tree (MST)  
309 (Figure 3) of the entire network (Supplementary Figure 3).

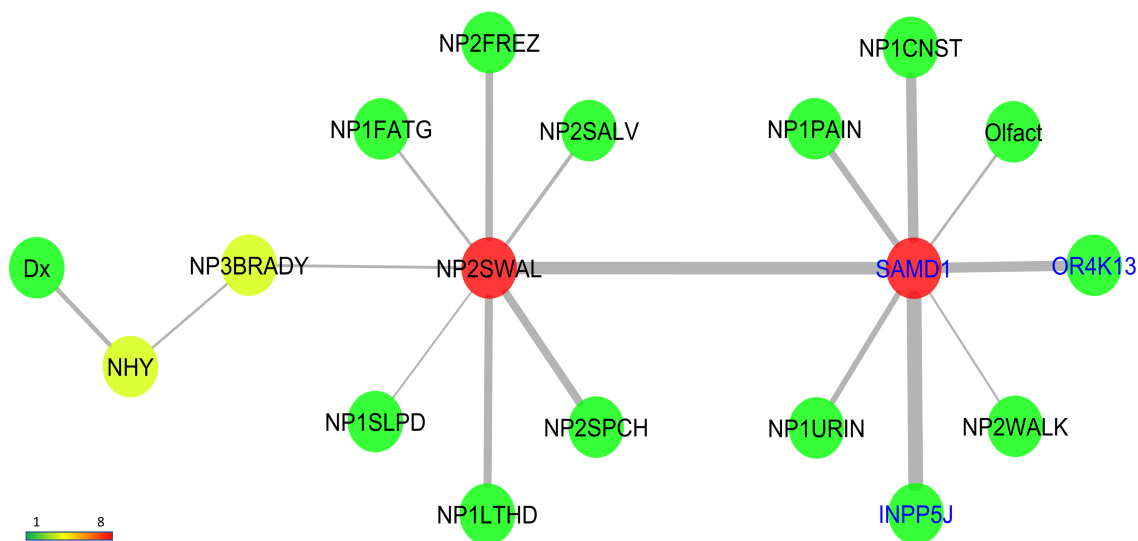

Figure 3: Maximum Spanning Tree (MST) of the network generated by embedding higher-order cumulants. Nodes representing phenotypes and genes have black and blue labels, respectively. Edge widths are directly proportional to their weights. Color of nodes relate to their degree, red being the highest and green being lowest.

310 The first community with the variables  $Dx$  and  $NHY$  are straightforward to interpret as  
311 PD diagnosis and HY scale are instrumental tools to understand the disease progression. The  
312 second community contains MDS-UPDRS variables which are all related to the movement  
313 of mouth muscles with saliva, drooling, speech and swallowing. Also present are variables  
314 related to dizziness and fatigue such as light-headedness, daytime sleepiness, etc. which are  
315 all early symptoms of PD. Lastly, and most importantly, we observe the gene *SAMD1* plays  
316 a very crucial and central role in the network. *SAMD1* is expressed in blood and immune  
317 system including T lymphocytes as well as in brain tissues. T lymphocytes have been shown  
318 to recognize  $\alpha$ -synuclein peptides in PD patient [35] and thus we present evidence for a  
319 previously unreported association of the gene *SAMD1* in PD diagnosis and early symptoms.  
320 The gene *INPP5J* is also present in the cluster and is known to be associated in Lowe syndrome  
321 which causes renal failure and affects the brain. Here, likewise, it interacts with MDS-UPDRS  
322 variables related to constipation and urinary problems in early onset PD. Also present in the  
323 cluster is the gene *OR4K13* (Olfactory receptor gene) which interacts with the phenotype  
324 *Olfact* capturing olfactory problems in early onset PD patients. Thus, CuNA reveals the  
325 relationships with genes and clinical features of PD as represented by MDS-UPDRS variables,  
326 HY scale, etc. decoding the heterogeneity of the clinical features of PD.

## 327 4 Discussion

328 The cumulant-based network analysis, CuNA, introduced here, can be used to detect genes  
329 associated with clinical features in higher-dimensional space, adding granular view in contrast  
330 to traditional case-control studies. There is a dearth of methods addressing the genetic associ-  
331 ations and underlying biological pathways of the symptoms and clinical features of idiopathic  
332 PD or other complex diseases. This approach provides a framework integrating genotype,  
333 gene expression and endophenotypes as input and finds relationships between them. eQTLs  
334 and genotype-phenotype interactions are often plagued by false positives due to uncorrected  
335 confounding effects such as population structure, environmental factors, etc. Hence, it is im-  
336 portant to test the robustness of CuNA to find whether it captures true biomarkers associated  
337 with phenotypes of interest. We designed CuNASim, a fast and efficient multi-omics simulator  
338 which supports an array of phenotypes or clinical features to be tested alongside genotypes and  
339 gene expression data. The "piped" algorithm structure of CuNA takes in input the simulated  
340 data from CuNASim and accurately captures the correlated features in forms of communities  
341 in the network. Thus, CuNA is robust under different simulation scenarios and accurately

342 finds true associations.

343 CuNA computes cumulants in the form of redescription groups. Cumulants are higher-  
344 order moments and thus expensive to compute. Higher-order cumulants play an important  
345 role in the analysis of non-normally distributed multivariate data and the computational com-  
346 plexity increases with the order by a factor of  $n^d$ , where  $d$  is the order of the cumulant and  $n$  is  
347 the number of marginal variables. In genomics parlance, this creates a computational bottle-  
348 neck as the number of variables are in the order of hundreds of thousands with the decreasing  
349 cost of sequencing. Thus CuNA undergoes a computational bottleneck in the cumulant com-  
350 putation with increasing number of variables. Advances in randomized algorithms and tensor  
351 decomposition allows for faster computation of cumulants. A possible future direction is to  
352 make CuNA faster by leveraging super-symmetric tensors in block structures and efficient  
353 cumulant computation.

354 Applying CuNA to a Parkinson’s disease data set of genotype and RNA-seq expression  
355 data from blood samples with associated multitude of phenotypic measurements, we found  
356 several novel candidate genes associated with PD phenotypes. We run CuNA on the candidate  
357 significant *cis-eGenes* obtained by computing eQTLs. These *cis-eGenes* captured similar case-  
358 control classification performance as the whole data set. They were also enriched in the inositol  
359 phosphate metabolism pathway which is linked with neurodegenerative diseases such as PD.  
360 Thus, the *cis-eGenes* have both biological and statistical significance in the context of PD.  
361 As latent population stratification can lead to spurious eQTLs and confound the study, we  
362 included the top twenty PCs as covariates in the analysis. CuNA reveals cliques associated  
363 with related biological functions such as constipation, urination and renal failure and the  
364 gene INPP5J which is implicated in Lowe Syndrome and is found to be significant in both  
365 brain and kidney cortex tissues in GTEx analysis (Supplementary Table A). MDS-UPDRS  
366 measures were found to be associated with genes such as SAMD1 which is expressed in blood  
367 and immune system as well as brain tissues. Blood-based gene expression such as analyzed  
368 here has shown similarity with brain-based expression and is an intriguing noninvasive option  
369 for capturing neurodegenerative disease progression [36].

370 CuNA can disentangle the complex higher-order genotype-phenotype interactions, embed  
371 them in a network and analyze it. Network analysis and community detection approaches  
372 provide a deeper understanding of association studies involving eQTLs and phenotypes of in-  
373 terest with a visualization tool. The hyper-parameters and user-defined parameter thresholds  
374 can be varied to observe robustness and sensitivity of the method in handling false positives.



## 375 **5 Conclusion**

376 Associations between genotype, gene expression and phenotype data can be complex and  
377 often confounded by various environmental factors. We propose a novel framework CuNA  
378 to identify associations with more granularity than a standard case-control association study.  
379 We demonstrate that CuNA captures true associations by applying it on simulated data as  
380 obtained from our novel multi-omics simulator CuNASim. When applied to PD diagnostic data  
381 encompassing clinical features along with motor and non-motor symptoms, CuNA identifies  
382 novel gene-phenotype relationships while replicating already known associations with PD.

383 GWAS has the potential to find loci with common genetic variants contributing to disease  
384 risk. It has been extensively used in PD finding genes associated with disease risk. However, in  
385 progressive diseases such as PD, Alzheimer's, cancer, cardiovascular diseases, etc. with a rich  
386 repository of phenotypes or clinical features, it is of significance to study the genes associated  
387 with an ensemble of the features sharing similar biological pathway. CuNA provides an exciting  
388 opportunity to decode phenotypic and genotypic diversity and discover genes associated with  
389 various manifestations of complex diseases, paving the way for future biomarker discovery and  
390 personalized therapeutics.

## 391 **6 Acknowledgements**

392 Data used in the preparation of this article were obtained from the Parkinson's Progression  
393 Markers Initiative (PPMI) database ([www.ppmi-info.org/data](http://www.ppmi-info.org/data)). For up-to-date information  
394 on the study, visit [www.ppmi-info.org](http://www.ppmi-info.org).

## References

395

- 396 [1] Billingsley, K., Bandres-Ciga, S., Saez-Atienzar, S., and Singleton, A. (2018). Genetic  
397 risk factors in Parkinson’s disease. *Cell and tissue research* **373**(1), 9–20.
- 398 [2] Nica, A. C. and Dermitzakis, E. T. (2013). Expression quantitative trait loci: present and  
399 future. *Philosophical Transactions of the Royal Society B: Biological Sciences* **368**(1620),  
400 20120362.
- 401 [3] Gilad, Y., Rifkin, S. A., and Pritchard, J. K. (2008). Revealing the architecture of gene  
402 regulation: the promise of eQTL studies. *Trends in genetics* **24**(8), 408–415.
- 403 [4] Satake, W., Nakabayashi, Y., Mizuta, I., Hirota, Y., Ito, C., Kubo, M., Kawaguchi, T.,  
404 Tsunoda, T., Watanabe, M., Takeda, A., et al. (2009). Genome-wide association study  
405 identifies common variants at four loci as genetic risk factors for Parkinson’s disease.  
406 *Nature genetics* **41**(12), 1303–1307.
- 407 [5] Nalls, M., Plagnol, V., Hernandez, D., Sharma, M., Sheerin, U., Saad, M., Simón-  
408 Sánchez, J., Schulte, C., Lesage, S., Sveinbjörnsdóttir, S., et al. (2011). International  
409 Parkinson Disease Genomics Consortium Imputation of sequence variants for identifica-  
410 tion of genetic risks for Parkinson’s disease: A meta-analysis of genome-wide association  
411 studies. *Lancet* **377**(9766), 641–649.
- 412 [6] Latourelle, J. C., Dumitriu, A., Hadzi, T. C., Beach, T. G., and Myers, R. H. (2012).  
413 Evaluation of Parkinson disease risk variants as expression-QTLs. *PloS one* **7**(10), e46199.
- 414 [7] Corti, O., Lesage, S., and Brice, A. (2011). What genetics tells us about the causes and  
415 mechanisms of Parkinson’s disease. *Physiological reviews* **91**(4), 1161–1218.
- 416 [8] Lees, A. J., Hardy, J., and Revesz, T. (2009). Parkinson’s disease. *The Lancet* **373**(9680),  
417 2055 – 2066.
- 418 [9] DeMaagd, G. and Philip, A. (2015). Parkinson’s disease and its management: part 1: dis-  
419 ease entity, risk factors, pathophysiology, clinical presentation, and diagnosis. *Pharmacy  
420 and therapeutics* **40**(8), 504.
- 421 [10] Mm, H. (1967). Yahr MD. Parkinsonism: onset, progression and mortality. *Neurology*  
422 **17**(5), 427–442.
- 423 [11] Goetz, C. G., Tilley, B. C., Shaftman, S. R., Stebbins, G. T., Fahn, S., Martinez-Martin,  
424 P., Poewe, W., Sampaio, C., Stern, M. B., Dodel, R., et al. (2008). Movement Disorder  
425 Society-sponsored revision of the Unified Parkinson’s Disease Rating Scale (MDS-  
426 UPDRS): scale presentation and clinimetric testing results. *Movement disorders: official  
427 journal of the Movement Disorder Society* **23**(15), 2129–2170.

- 428 [12] Chang, D., Nalls, M. A., Hallgrímsdóttir, I. B., Hunkapiller, J., Van Der Brug, M., Cai,  
429 F., Kerchner, G. A., Ayalon, G., Bingol, B., Sheng, M., et al. (2017). A meta-analysis  
430 of genome-wide association studies identifies 17 new Parkinson’s disease risk loci. *Nature*  
431 *genetics* **49**(10), 1511.
- 432 [13] Tolosa, E., Gaig, C., Santamaría, J., and Compta, Y. (2009). Diagnosis and the premotor  
433 phase of Parkinson disease. *Neurology* **72**(7 Supplement 2), S12–S20.
- 434 [14] Greenland, J. C., Williams-Gray, C. H., and Barker, R. A. (2019). The clinical het-  
435 erogeneity of Parkinson’s disease and its therapeutic implications. *European Journal of*  
436 *Neuroscience* **49**(3), 328–338.
- 437 [15] Horsager, J., Andersen, K. B., Knudsen, K., Skjærbæk, C., Fedorova, T. D., Okkels, N.,  
438 Schaeffer, E., Bonkat, S. K., Geday, J., Otto, M., et al. 08 (2020). Brain-first versus  
439 body-first Parkinson’s disease: a multimodal imaging case-control study. *Brain* **143**(10),  
440 3077–3088.
- 441 [16] Chung, R.-H. and Kang, C.-Y. (2019). A multi-omics data simulator for complex disease  
442 studies and its application to evaluate multi-omics data analysis methods for disease  
443 classification. *GigaScience* **8**(5), giz045.
- 444 [17] Mandal, S., Guzmán-Sáenz, A., Haiminen, N., Basu, S., and Parida, L. (2020). A  
445 Topological Data Analysis Approach on Predicting Phenotypes from Gene Expression  
446 Data. In *Algorithms for Computational Biology*, Martín-Vide, C., Vega-Rodríguez, M. A.,  
447 and Wheeler, T., editors, 178–187 (Springer International Publishing, Cham, 2020).
- 448 [18] Girvan, M. and Newman, M. E. (2002). Community structure in social and biological  
449 networks. *Proceedings of the national academy of sciences* **99**(12), 7821–7826.
- 450 [19] Shabalín, A. A. (2012). Matrix eQTL: ultra fast eQTL analysis via large matrix opera-  
451 tions. *Bioinformatics* **28**(10), 1353–1358.
- 452 [20] Bose, A., Kalantzis, V., Kontopoulou, E.-M., Elkady, M., Paschou, P., and Drineas, P.  
453 (2019). TeraPCA: a fast and scalable software package to study genetic variation in  
454 tera-scale genotypes. *Bioinformatics* **35**(19), 3679–3683.
- 455 [21] Chawla, N. V., Bowyer, K. W., Hall, L. O., and Kegelmeyer, W. P. (2002). SMOTE:  
456 synthetic minority over-sampling technique. *Journal of artificial intelligence research* **16**,  
457 321–357.
- 458 [22] Huang, K. April (2010). *Quantum Field Theory: From Operators to Path Integrals*.  
459 Wiley-VCH, Weinheim, 2nd edition edition.

- 460 [23] Rassoul-gha, F. and Seppalainen, T. March (2015). *A Course on Large Deviations With*  
461 *an Introduction to Gibbs Measures*. American Mathematical Society, Providence, Rhode  
462 Island.
- 463 [24] McCullagh, P. July (2018). *Tensor Methods in Statistics: Second Edition*. Dover Publi-  
464 cations, Mineola, New York, revised, updated edition edition.
- 465 [25] Yu, G., Wang, L.-G., Han, Y., and He, Q.-Y. (2012). clusterProfiler: an R package for  
466 comparing biological themes among gene clusters. *Omics: a journal of integrative biology*  
467 **16**(5), 284–287.
- 468 [26] Kanehisa, M. and Goto, S. (2000). KEGG: kyoto encyclopedia of genes and genomes.  
469 *Nucleic acids research* **28**(1), 27–30.
- 470 [27] Saha, A. and Battle, A. (2018). False positives in trans-eQTL and co-expression analyses  
471 arising from RNA-sequencing alignment errors. *F1000Research* **7**.
- 472 [28] Lonsdale, J., Thomas, J., Salvatore, M., Phillips, R., Lo, E., Shad, S., Hasz, R., Walters,  
473 G., Garcia, F., Young, N., et al. (2013). The genotype-tissue expression (GTEx) project.  
474 *Nature genetics* **45**(6), 580–585.
- 475 [29] Davies, S. E., Hallett, P. J., Moens, T., Smith, G., Mangano, E., Kim, H. T., Goldberg,  
476 A. L., Liu, J.-L., Isacson, O., and Tofaris, G. K. (2014). Enhanced ubiquitin-dependent  
477 degradation by Nedd4 protects against  $\alpha$ -synuclein accumulation and toxicity in animal  
478 models of Parkinson’s disease. *Neurobiology of disease* **64**, 79–87.
- 479 [30] Gonzalez-Cano, L., Menzl, I., Tisserand, J., Nicklas, S., and Schwamborn, J. C. (2018).  
480 Parkinson’s disease-associated mutant LRRK2-mediated inhibition of miRNA activity is  
481 antagonized by TRIM32. *Molecular neurobiology* **55**(4), 3490–3498.
- 482 [31] Rivière, J.-B., Ramalingam, S., Lavastre, V., Shekarabi, M., Holbert, S., Lafontaine, J.,  
483 Srour, M., Merner, N., Rochefort, D., Hince, P., et al. (2011). KIF1A, an axonal trans-  
484 porter of synaptic vesicles, is mutated in hereditary sensory and autonomic neuropathy  
485 type 2. *The American Journal of Human Genetics* **89**(2), 219–230.
- 486 [32] Samata, B., Doi, D., Nishimura, K., Kikuchi, T., Watanabe, A., Sakamoto, Y., Kakuta,  
487 J., Ono, Y., and Takahashi, J. (2016). Purification of functional human ES and iPSC-  
488 derived midbrain dopaminergic progenitors using LRTM1. *Nature communications* **7**(1),  
489 1–11.
- 490 [33] Narayanan, V., Guo, Y., and Scarlata, S. (2005). Fluorescence studies suggest a role  
491 for  $\alpha$ -synuclein in the phosphatidylinositol lipid signaling pathway. *Biochemistry* **44**(2),  
492 462–470.

- 493 [34] Berridge, M. J. (2016). The inositol trisphosphate/calcium signaling pathway in health  
494 and disease. *Physiological reviews* **96**(4), 1261–1296.
- 495 [35] Sulzer, D., Alcalay, R. N., Garretti, F., Cote, L., Kanter, E., Agin-Liebes, J., Liong, C.,  
496 McMurtrey, C., Hildebrand, W. H., Mao, X., et al. (2017). T cells from patients with  
497 Parkinson’s disease recognize  $\alpha$ -synuclein peptides. *Nature* **546**(7660), 656–661.
- 498 [36] Iturria-Medina, Y., Khan, A. F., Adewale, Q., Shirazi, A. H., and the Alzheimer’s Disease  
499 Neuroimaging Initiative. 01 (2020). Blood and brain gene expression trajectories mirror  
500 neuropathology and clinical deterioration in neurodegeneration. *Brain* **143**(2), 661–673.
- 501 [37] Servin, B. and Stephens, M. (2007). Imputation-based analysis of association studies:  
502 candidate regions and quantitative traits. *PLoS genetics* **3**(7).
- 503 [38] Abecasis, G. R., Cherny, S. S., Cookson, W. O., and Cardon, L. R. (2002). Merlin—rapid  
504 analysis of dense genetic maps using sparse gene flow trees. *Nature genetics* **30**(1), 97–101.
- 505 [39] Hoggart, C. J., Whittaker, J. C., De Iorio, M., and Balding, D. J. (2008). Simultaneous  
506 analysis of all SNPs in genome-wide and re-sequencing association studies. *PLoS genetics*  
507 **4**(7).
- 508 [40] Marazziti, D., Di Pietro, C., Golini, E., Mandillo, S., Matteoni, R., and Tocchini-  
509 Valentini, G. P. (2009). Macroautophagy of the GPR37 orphan receptor and Parkinson  
510 disease-associated neurodegeneration. *Autophagy* **5**(5), 741–742.
- 511 [41] Jayapalan, S., Subramanian, D., and Natarajan, J. (2016). Computational identification  
512 and analysis of neurodegenerative disease associated protein kinases in hominid genomes.  
513 *Genes & diseases* **3**(3), 228–237.
- 514 [42] Berger, B. S., Acebron, S. P., Herbst, J., Koch, S., and Niehrs, C. (2017). Parkinson’s  
515 disease-associated receptor GPR 37 is an ER chaperone for LRP 6. *EMBO reports* **18**(5),  
516 712–725.

517

## Supplementary Materials

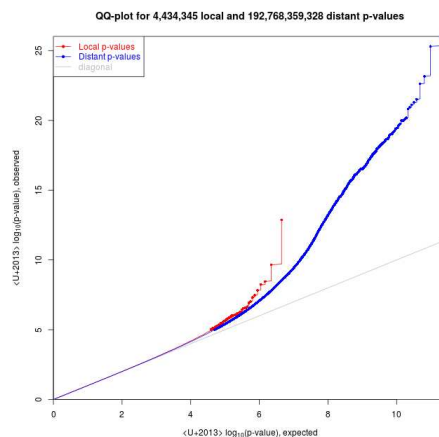

Figure 4: QQ plot showing statistical significance of *cis* (Local p-values, red) and *trans* (Distant p-values, blue) eQTLs.

518

### eQTL analysis

519

The goal of eQTL analysis is to identify SNPs which are significantly associated with expression of known genes. They reveal complex biological processes underlying diseased systems and help discover latent genetic factors causing certain diseases. Most eQTL studies perform separate association tests for each transcript-SNP pair. Association testing can be done in a straightforward manner by linear regression or ANOVA models and if required, non-linear techniques such as generalized linear and mixed models, Bayesian regression [37], accounting for pedigree [38], etc. Many methods have been developed to find groups of SNPs associated with expression of a single gene [8, 39]. With the advancement of sequencing techniques and decreasing cost there has been an unprecedented growth in genotype and expression level data. As eQTL studies identify SNPs which are significantly associated with expression of known genes, they can be computationally intensive resulting in billions of associations for large scale data. The simple linear regression is one of the most commonly used methods for eQTLs.

530

$$y = \alpha + \beta s + \epsilon \quad (4)$$

531

where  $\epsilon \sim \text{i.i.d } N(0, \sigma^2)$ . The number of such tests can easily result in billions. Instead, if we let  $\mathbf{G}$  is the gene expression matrix, with each row containing measurements for a single gene across individuals and  $\mathbf{S}$  be the genotype matrix, with each row containing measurements for a single SNP across individuals. Then the matrix of all gene-SNP correlations can be calculated

532

533

534

535 in one large matrix multiplication. Thus we have,

$$\mathbf{Y} = \mathbf{GS}^T \quad (5)$$

536 The correlations are thus computed in Equation 5 and we report the corresponding test  
537 statistic,  $p$ -value, FDR, etc.

## 538 Redescriptions

539 Subjects  $s \in \mathcal{S}$  are described by a list of features  $f_i(s)$  indexed by feature labels  $i \in \mathcal{F}$ . Each  
540 feature has an alphabet  $\mathcal{A}_i$  so that  $f_i(s) \in \mathcal{A}_i$ . That alphabet is often binary, but could be  
541 defined on the reals. Examples of binary features in  $\mathcal{F}$  are diagnoses (Dx) such as hypertension  
542 (HT) or type-II diabetes (T2D), or body mass index (bmi) which would have a continuum  
543 alphabet ( $\mathcal{A}_{bmi} = \mathbb{R}$ ).

544 For a given  $a_i \in \mathcal{A}_i$ , the set of subjects that have that value is  $f_i^{-1}(a_i) \subseteq \mathcal{S}$ . So the list  
545 of subjects with hypertension can be written  $f_{HT}^{-1}(1)$ . In the case of continuous variables,  
546 the selection of sets is according to a threshold, such as the mean  $m(f_i(S))$ , mapped to 1 if  
547  $f_i(s) \geq m(f_i(S))$ .

548 Patterns may be described in terms of conjunctions  $i \wedge j$  for  $i, j \in \mathcal{F}$  such that  $f_{i \wedge j}^{-1}(a_i, a_j) =$   
549  $f_i^{-1}(a_i) \cap f_j^{-1}(a_j)$  for binary  $a_i, a_j$ . This definition is extended to include either atomic  $i, j$ ,  
550 such as HT or T2D, or coronary artery disease (CAD), or to any combinations of conjunctions  
551 subject to the logical algebra of  $\wedge$  (e.g.  $(i \wedge j) \wedge (i \wedge k) = i \wedge j \wedge k$  for  $i, j, k \in \mathcal{F}$  subject  
552 to values  $a_i, a_j, a_k$ ). So we can specify the diabetic hypertensive subjects as  $f_{T2D \wedge HT}^{-1}(T2D =$   
553  $1, HT = 1)$ . Such combinations of conjunctions  $i$  that have more or less members  $f_i^{-1}(a)$  than  
554 expected by chance are called patterns.

555 Binomial and other tests of the significance of patterns can be dominated by lower-order  
556 correlations among the variables in a pattern.

557 Two distinct patterns that yield the same subsets of subjects, e.g.  $f_i^{-1}(a) = f_j^{-1}(a)$ , are  
558 called “redescriptions.” If conjunctions yield a form such as  $A \cap B = B$ , then it may be  
559 deduced that  $B \subset A$ , and the conditions yielding  $A$  and  $B$  satisfy  $b \Rightarrow a$ . In other words,  
560 redescriptions can reveal logical relationships among features. Such relationships may reflect  
561 underlying biological pathways reflected in these connected phenotype patterns. Therefore,  
562 each of these patterns  $i$  specify a phenotype, which may be associated with genotypes or other  
563 -omic data using standard methods.

564 Given the presence of misclassifications, differential evolution of disease stages, simple

565 transcription mistakes, etc, result in errors in estimates of  $f_i^{-1}(a)$  must be accounted for in  
566 estimating equivalence. We can use Jaccard distances  $d = 1 - \frac{|A \cap B|}{|A \cup B|}$  measures deviations. So  
567  $d(A \cup B, B) = 1 - \frac{|A \cup B|}{|B|}$  is 0 if  $B \subseteq A$ , some non-zero value with any  $B \not\subseteq A$ . This distance  
568 measures the probability that samples drawn from  $A$  and  $B$  are not shared, which gives an  
569 index for the possible to distinguish disruption due to errors, or whether it would be possible  
570 to distinguish non biological pathways vs. biological pathways with error.

## 571 Population Structure

572 The PPMI data set has population structure which may confound the eQTL computation and  
573 therefore result in spurious associations in downstream CuNA computations. We observe a  
574 main cluster of “RAWHITE” which relates to the Europeans and Caucasian ethnicities present  
575 in the data set. Another cluster appears in the scatterplot of the top two PCs (Figure 5) related  
576 to the “RABLACK” or the African ethnicities in the data. These legends are defined by the  
PPMI study.

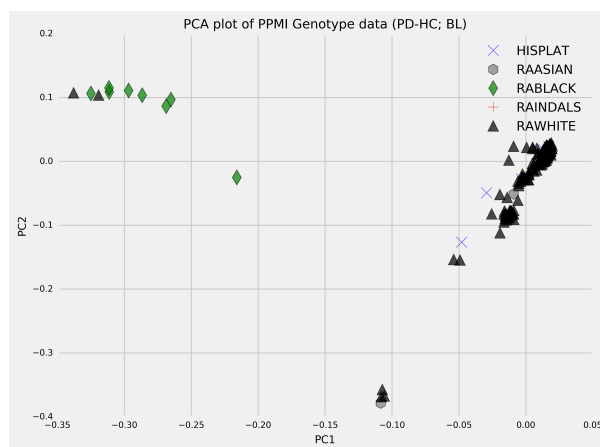

Figure 5: Scatterplot of the top two PCs computed on the genotype data reveals the population structure in PPMI data set (456 individuals).

577



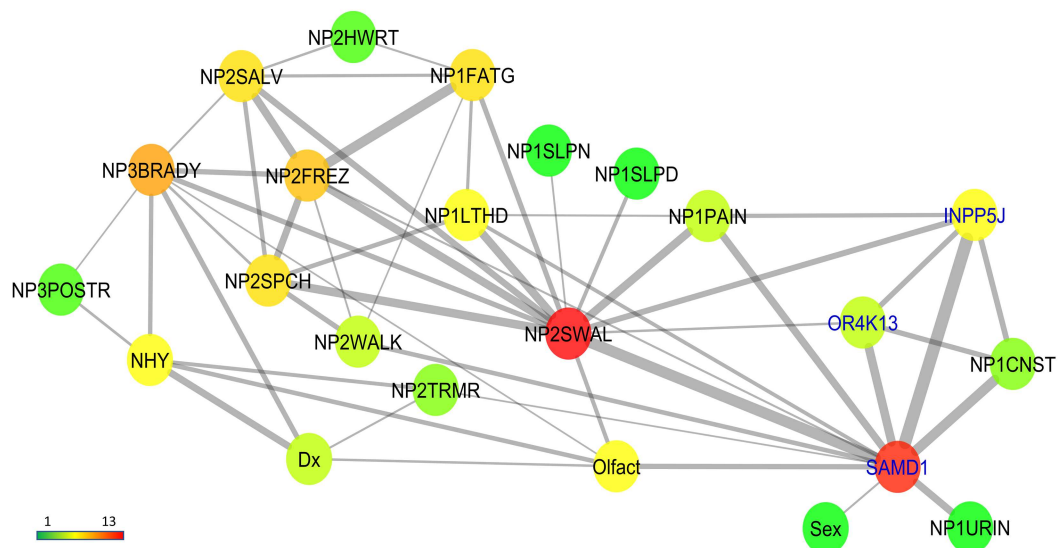

Figure 6: Interaction networks between genes and PD phenotypes with only top 20% of the edges present. Genes are highlighted in blue and phenotypes in black. The color of the nodes relate to their degrees, red being the highest and green being the lowest degree.

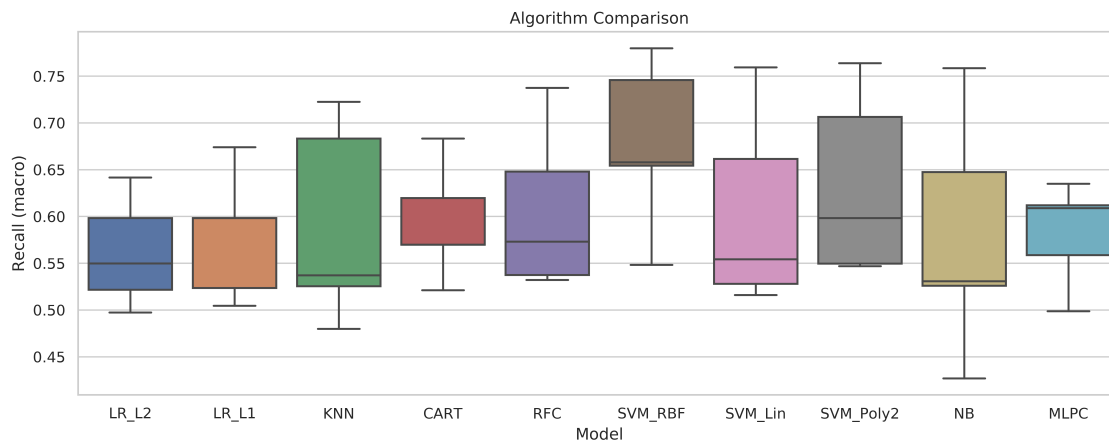

Figure 7: Classification performance comparison on training set with 24 eGenes and 75% of the 456 individuals (293 PD, 163 HC). We compare the Recall as we are more interested in the true positive classification and selected SVM with RBF kernel as it performed best.

| Genetic variant | GTEx expression tissue                                                                | Brain Regions                                             | Reported |
|-----------------|---------------------------------------------------------------------------------------|-----------------------------------------------------------|----------|
| rs60444836      | Brain                                                                                 | AM                                                        | -        |
| NEDD4           | Brain                                                                                 | ALL                                                       | [29]     |
| RNASE4          | Brain                                                                                 | ALL                                                       | -        |
| SLC25A51        | Brain                                                                                 | ALL                                                       | -        |
| LRTM1           | Brain                                                                                 | AM, Anterior cingulate cortex, BG, CO, Frontal cortex, HI | [32]     |
| CEACAM8         | Brain                                                                                 | CH, CE, CO, SN                                            | -        |
| KIF18B          | Brain                                                                                 | ALL                                                       | -        |
| GPRC5B          | Brain                                                                                 | ALL                                                       | [40]     |
| AGO2            | Brain, Pancreas, Liver, Whole blood, Lung, Stomach, Kidney cortex, etc.               | ALL                                                       | [30]     |
| ROS1            | Brain                                                                                 | ALL                                                       | [41]     |
| AC097721        | Brain                                                                                 | BG, HI, HY, SCC, SN                                       | -        |
| CTB-5506.12     | Brain                                                                                 | ALL                                                       | -        |
| KIF1A           | Brain                                                                                 | ALL                                                       | [31]     |
| FAM225B         | Brain, Prostate, Uterus, Ovary, Thyroid, etc.                                         | ALL                                                       | -        |
| SAMD1           | Brain, Whole blood, Liver, Kidney Cortex, Stomach, etc.                               | ALL                                                       | -        |
| INPP5J          | Brain, Adipose, Uterus, Whole blood, Ovary, Lung, Liver, Kidney cortex, Stomach, etc. | ALL                                                       | -        |
| LRP6            | Brain, Whole blood, Skin, Ovary, Kidney cortex, etc.                                  | ALL                                                       | [42]     |
| ENY2            | Brain, Whole blood, Stomach, Liver, Lung, Kidney cortex, etc.                         | ALL                                                       | -        |
| DPMI1           | Brain, Whole blood, Skin, Pancreas, Stomach, Thyroid, Liver, etc.                     | ALL                                                       | -        |

Table 2: One *cis*-eSNP (other *cis*-eSNPs are not associated with expression in brain) and 18 protein-coding *cis*-eGenes highlighted by eQTL analysis (remaining 6 out of 24 *cis*-eGenes are pseudogenes). The tissues they are expressed in (GTEx v8), along with the reported regions in the brain are shown. Previously reported implications in PD are cited when available. ALL brain regions include: Amygdala (AM), Basal ganglia (BG), Cerebellum (CE), Cortex (CO), Cerebellar hemisphere (CH), Hippocampus (HI), Hypothalamus (HY), Spinal cord cervical (SCC), Substantia nigra (SN).

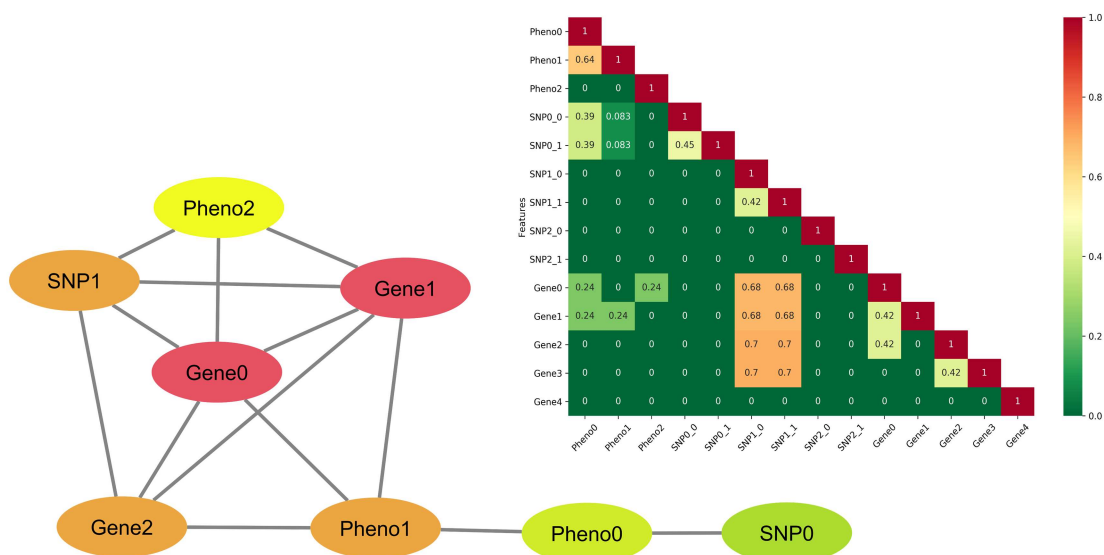

Figure 8: Network of the simulated variables colored by degrees of each node (darker colors have more degree). The correlation matrix of the variables is shown in the inset with the color gradient.

Table 3:  $\mu$  for multivariate Gaussian distribution and standard variation  $\sigma$  for each parameter in the first simulation scenario.

| Features           | $\mu$ | $\sigma$ |
|--------------------|-------|----------|
| Standard variation | 0.5   | 1.34     |
| Pheno1             | 0.5   | 1.16     |
| Pheno2             | -0.1  | 2        |
| SNP0               | 0.3   | 1.81     |
| SNP0               | 0.1   | 1.81     |
| SNP1               | 0.3   | 1.72     |
| SNP1               | 0.5   | 1.72     |
| SNP2.0             | 0.5   | 1        |
| SNP2.1             | 0.5   | 1        |
| Gene0              | 1     | 5.16     |
| Gene1              | 1     | 5.16     |
| Gene2              | 3     | 5.16     |
| Gene3              | 3     | 5.16     |
| Gene4              | 3     | 3        |

Table 4: Baseline proportions for binary variates computed from multivariate distributions corresponding to case-control proportions and MAFs in the first simulation scenario.

| $L$    | $P_L$ |
|--------|-------|
| Pheno0 | 0.667 |
| Pheno1 | 0.679 |
| Pheno2 | 0.48  |
| SNP0   | 0.588 |
| SNP1   | 0.53  |
| SNP2   | 0.59  |
| SNP1_1 | 0.648 |
| SNP2_0 | 0.691 |
| SNP2_1 | 0.691 |

Table 5: Odds ratios and proportions of binary measures given either phenotype state or allele in the first simulation scenario.

| $L_1$  | $L_2$  | OR    | $P_{L_1 L_2}$ | $P_{L_1 \bar{L}_2}$ | $P_{L_2 L_1}$ | $P_{L_2 \bar{L}_1}$ |
|--------|--------|-------|---------------|---------------------|---------------|---------------------|
| Pheno0 | Pheno1 | 7.093 | 0.807         | 0.371               | 0.821         | 0.393               |
| Pheno0 | Pheno2 | 1     | 0.667         | 0.667               | 0.48          | 0.48                |
| Pheno0 | SNP0_0 | 2.87  | 0.764         | 0.529               | 0.673         | 0.418               |
| Pheno0 | SNP0_1 | 2.875 | 0.775         | 0.545               | 0.615         | 0.358               |
| Pheno0 | SNP1_0 | 1     | 0.667         | 0.667               | 0.59          | 0.59                |
| Pheno0 | SNP1_1 | 1     | 0.667         | 0.667               | 0.648         | 0.648               |
| Pheno0 | SNP2_0 | 1     | 0.667         | 0.667               | 0.691         | 0.691               |
| Pheno0 | SNP2_1 | 1     | 0.667         | 0.667               | 0.691         | 0.691               |
| Pheno1 | Pheno2 | 1     | 0.679         | 0.679               | 0.48          | 0.48                |
| Pheno1 | SNP0_0 | 1.244 | 0.698         | 0.651               | 0.605         | 0.552               |
| Pheno1 | SNP0_1 | 1.243 | 0.701         | 0.654               | 0.547         | 0.493               |
| Pheno1 | SNP1_0 | 1     | 0.679         | 0.679               | 0.59          | 0.59                |
| Pheno1 | SNP1_1 | 1     | 0.679         | 0.679               | 0.648         | 0.648               |
| Pheno1 | SNP2_0 | 1     | 0.679         | 0.679               | 0.691         | 0.691               |
| Pheno1 | SNP2_1 | 1     | 0.679         | 0.679               | 0.691         | 0.691               |
| Pheno2 | SNP0_0 | 1     | 0.48          | 0.48                | 0.588         | 0.588               |
| Pheno2 | SNP0_1 | 1     | 0.48          | 0.48                | 0.53          | 0.53                |
| Pheno2 | SNP1_0 | 1     | 0.48          | 0.48                | 0.59          | 0.59                |
| Pheno2 | SNP1_1 | 1     | 0.48          | 0.48                | 0.648         | 0.648               |
| Pheno2 | SNP2_0 | 1     | 0.48          | 0.48                | 0.691         | 0.691               |
| Pheno2 | SNP2_1 | 1     | 0.48          | 0.48                | 0.691         | 0.691               |
| SNP0_0 | SNP0_1 | 3.407 | 0.724         | 0.435               | 0.652         | 0.355               |
| SNP0_0 | SNP1_0 | 1     | 0.588         | 0.588               | 0.59          | 0.59                |
| SNP0_0 | SNP1_1 | 1     | 0.588         | 0.588               | 0.648         | 0.648               |
| SNP0_0 | SNP2_0 | 1     | 0.588         | 0.588               | 0.691         | 0.691               |
| SNP0_0 | SNP2_1 | 1     | 0.588         | 0.588               | 0.691         | 0.691               |
| SNP0_1 | SNP1_0 | 1     | 0.53          | 0.53                | 0.59          | 0.59                |
| SNP0_1 | SNP1_1 | 1     | 0.53          | 0.53                | 0.648         | 0.648               |
| SNP0_1 | SNP2_0 | 1     | 0.53          | 0.53                | 0.691         | 0.691               |
| SNP0_1 | SNP2_1 | 1     | 0.53          | 0.53                | 0.691         | 0.691               |
| SNP0_1 | SNP1_0 | 3.16  | 0.688         | 0.411               | 0.755         | 0.494               |
| SNP0_1 | SNP2_0 | 1     | 0.59          | 0.59                | 0.691         | 0.691               |
| SNP0_1 | SNP2_1 | 1     | 0.59          | 0.59                | 0.691         | 0.691               |
| SNP1_0 | SNP2_0 | 1     | 0.648         | 0.648               | 0.691         | 0.691               |

Table 6:  $\mu$  for multivariate Gaussian distribution and standard variation  $\sigma$  for each parameter in the second simulation scenario.

| Features | mu   | sigma |
|----------|------|-------|
| Pheno0   | 0.5  | 2.28  |
| Pheno1   | 0.5  | 2.45  |
| Pheno2   | -0.1 | 2     |
| SNP0_0   | 0.3  | 1     |
| SNP0_1   | 0.1  | 1.81  |
| SNP1_0   | 0.3  | 1     |
| SNP1_1   | 0.5  | 1     |
| SNP2_0   | 0.5  | 1.64  |
| SNP2_1   | 0.5  | 1     |
| Gene0    | 1    | 5.43  |
| Gene1    | 1    | 5.43  |
| Gene2    | 3    | 3     |
| Gene3    | 3    | 7.86  |
| Gene4    | 3    | 3     |

Table 7: Baseline proportions for binary variates computed from multivariate distributions corresponding to case-control proportions and MAFs in the second simulation scenario.

| $L$    | $P_L$ |
|--------|-------|
| Pheno0 | 0.63  |
| Pheno1 | 0.625 |
| Pheno2 | 0.48  |
| SNP0_0 | 0.618 |
| SNP0_1 | 0.53  |
| SNP1_0 | 0.618 |
| SNP1_1 | 0.691 |
| SNP2_0 | 0.652 |
| SNP2_1 | 0.691 |

Table 8: Odds ratios and proportions of binary measures given either phenotype state or allele in the second simulation scenario.

| $L_1$  | $L_2$  | $OR$   | $P_{L_1 L_2}$ | $P_{L_1 \bar{L}_2}$ | $P_{L_2 L_1}$ | $P_{L_2 \bar{L}_1}$ |
|--------|--------|--------|---------------|---------------------|---------------|---------------------|
| Pheno0 | Pheno1 | 8.055  | 0.804         | 0.338               | 0.799         | 0.33                |
| Pheno0 | Pheno2 | 1      | 0.63          | 0.63                | 0.48          | 0.48                |
| Pheno0 | SNP0_0 | 1      | 0.63          | 0.63                | 0.618         | 0.618               |
| Pheno0 | SNP0_1 | 1      | 0.63          | 0.63                | 0.53          | 0.53                |
| Pheno0 | SNP1_0 | 1      | 0.63          | 0.63                | 0.618         | 0.618               |
| Pheno0 | SNP1_1 | 1      | 0.63          | 0.63                | 0.691         | 0.691               |
| Pheno0 | SNP2_0 | 19.026 | 0.846         | 0.224               | 0.876         | 0.271               |
| Pheno0 | SNP2_1 | 1      | 0.63          | 0.63                | 0.691         | 0.691               |
| Pheno1 | Pheno2 | 1      | 0.625         | 0.625               | 0.48          | 0.48                |
| Pheno1 | SNP0_0 | 1      | 0.625         | 0.625               | 0.618         | 0.618               |
| Pheno1 | SNP0_1 | 1      | 0.625         | 0.625               | 0.53          | 0.53                |
| Pheno1 | SNP1_0 | 1      | 0.625         | 0.625               | 0.618         | 0.618               |
| Pheno1 | SNP1_1 | 1      | 0.625         | 0.625               | 0.691         | 0.691               |
| Pheno1 | SNP2_0 | 2.365  | 0.696         | 0.492               | 0.726         | 0.528               |
| Pheno1 | SNP2_1 | 1      | 0.625         | 0.625               | 0.691         | 0.691               |
| Pheno2 | SNP0   | 1      | 0.48          | 0.48                | 0.618         | 0.618               |
| Pheno2 | SNP1   | 1      | 0.48          | 0.48                | 0.53          | 0.53                |
| Pheno2 | SNP2   | 1      | 0.48          | 0.48                | 0.618         | 0.618               |
| Pheno2 | SNP1_1 | 1      | 0.48          | 0.48                | 0.691         | 0.691               |
| Pheno2 | SNP2_0 | 1      | 0.48          | 0.48                | 0.652         | 0.652               |
| Pheno2 | SNP2_1 | 1      | 0.48          | 0.48                | 0.691         | 0.691               |
| SNP0_0 | SNP1   | 1      | 0.618         | 0.618               | 0.53          | 0.53                |
| SNP0_0 | SNP2   | 1      | 0.618         | 0.618               | 0.618         | 0.618               |
| SNP0_0 | SNP1_1 | 1      | 0.618         | 0.618               | 0.691         | 0.691               |
| SNP0_0 | SNP2_0 | 1      | 0.618         | 0.618               | 0.652         | 0.652               |
| SNP0_0 | SNP2_1 | 1      | 0.618         | 0.618               | 0.691         | 0.691               |
| SNP0_1 | SNP2   | 1      | 0.53          | 0.53                | 0.618         | 0.618               |
| SNP0_1 | SNP1_1 | 1      | 0.53          | 0.53                | 0.691         | 0.691               |
| SNP0_1 | SNP2_0 | 1      | 0.53          | 0.53                | 0.652         | 0.652               |
| SNP0_1 | SNP2_1 | 1      | 0.53          | 0.53                | 0.691         | 0.691               |
| SNP1_0 | SNP1_1 | 1      | 0.618         | 0.618               | 0.691         | 0.691               |
| SNP1_0 | SNP2_0 | 1      | 0.618         | 0.618               | 0.652         | 0.652               |
| SNP1_0 | SNP2_1 | 1      | 0.618         | 0.618               | 0.691         | 0.691               |
| SNP1_1 | SNP2_0 | 1      | 0.691         | 0.691               | 0.652         | 0.652               |
| SNP1_1 | SNP2_1 | 1      | 0.691         | 0.691               | 0.691         | 0.691               |
| SNP2_0 | SNP2_1 | 1      | 0.652         | 0.652               | 0.691         | 0.691               |
